# Supplementary material for: PIK3CA Gene Mutations in HNSCC: Systematic Review and Correlations with HPV Status and Patient Survival
Source: MDPI journal article supplement (doi:10.3390/cancers14051286), 2022-03-02

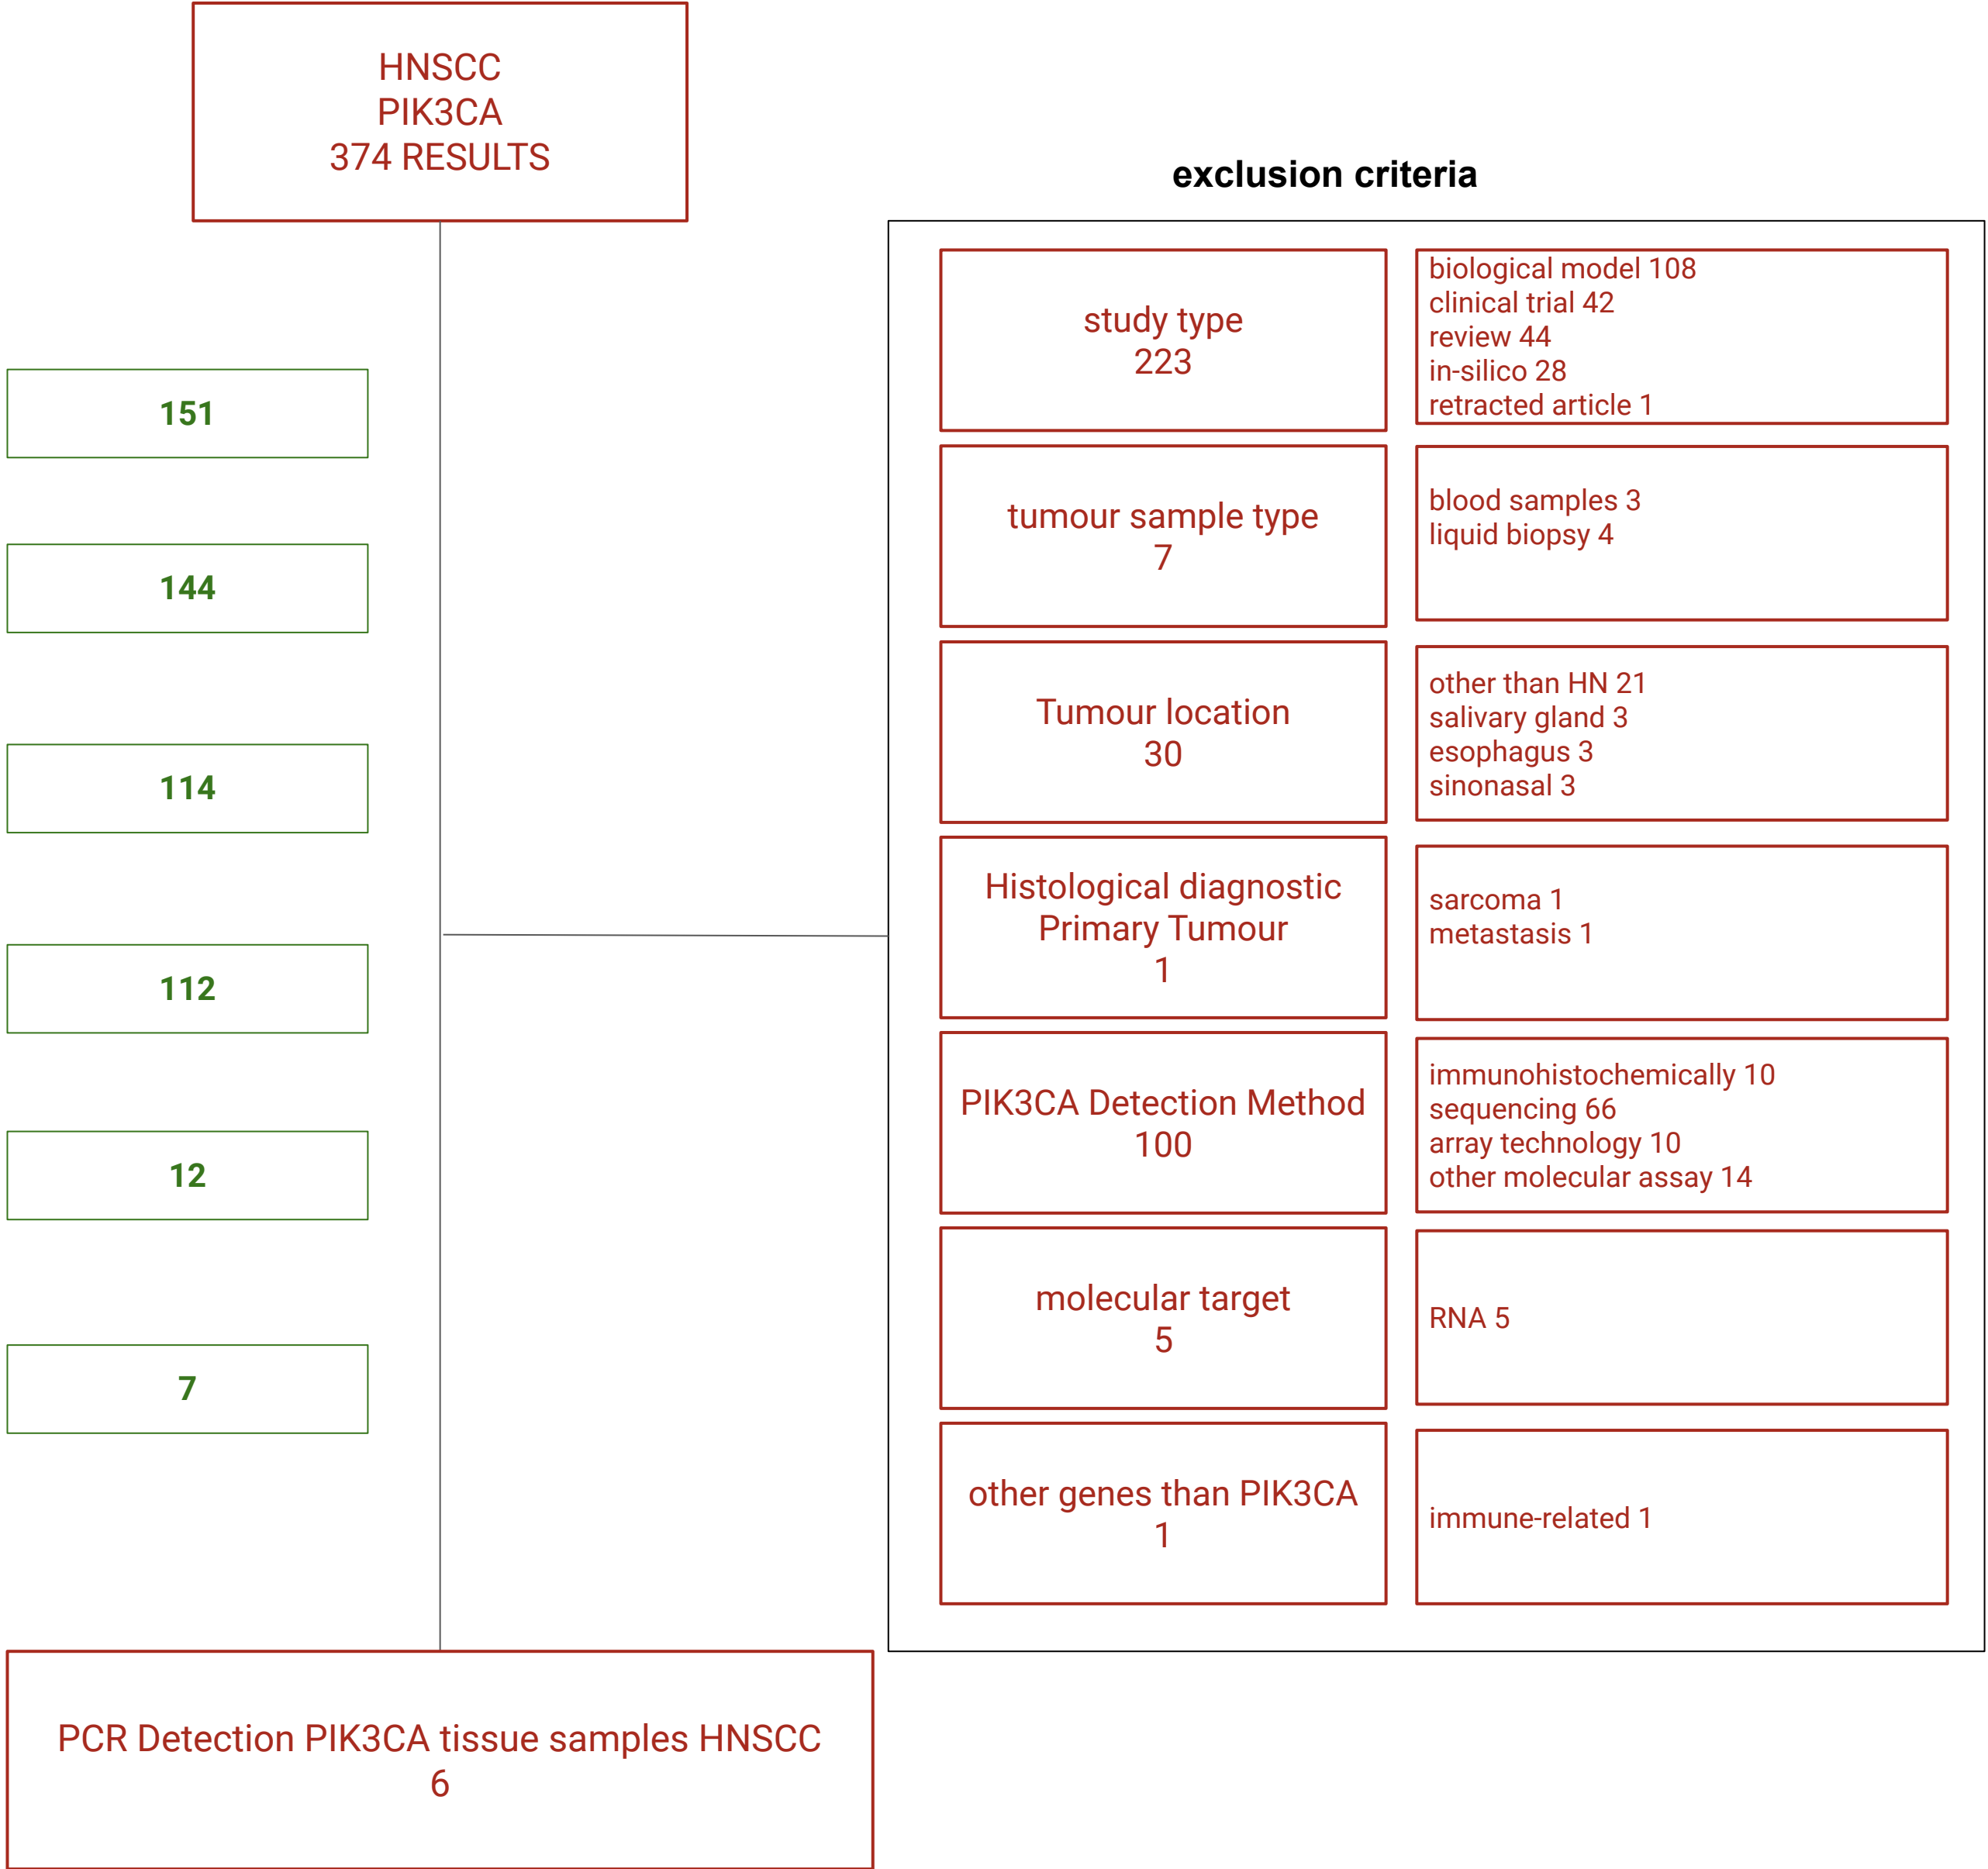

# working excluded data: sequencing

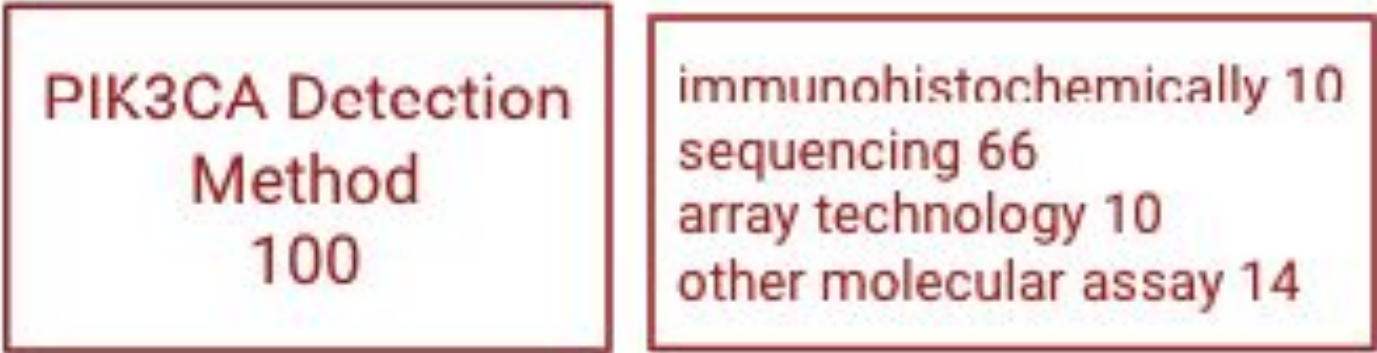

**HNSCC PIK3CA Mutation profile:** 66 articles eligible

- Exclusion Criteria:
- molecular Target RNA
  - without PIK3CA mutation profile data
  - no more than 5 patient cases

[1] Weiping Jie, et al 2021  
[2] Alsofyani AA, et al 2020  
[3] V. Denninghoff, et al 2020  
[4] Ghias K, et al 2020  
[5] Haft S, et al 2019  
[6] Lim SM, et al 2019  
[7] García-Carracedo D, et al 2016  
[8] Al-Amri AM, et al 2016  
[9] Chau NG, et al 2016  
[10] Shah S, et al 2015  
[11] Chen SJ, et al 2015.  
[12] Cortelazzi B, et al 2015  
[13] Nichols AC, et al 2013  
[14] Cohen Y, et al 2013  
[15] Bruckman KC, et al 2010  
[16] Qiu W, et al 2008  
[17] Qiu W, et al 2006

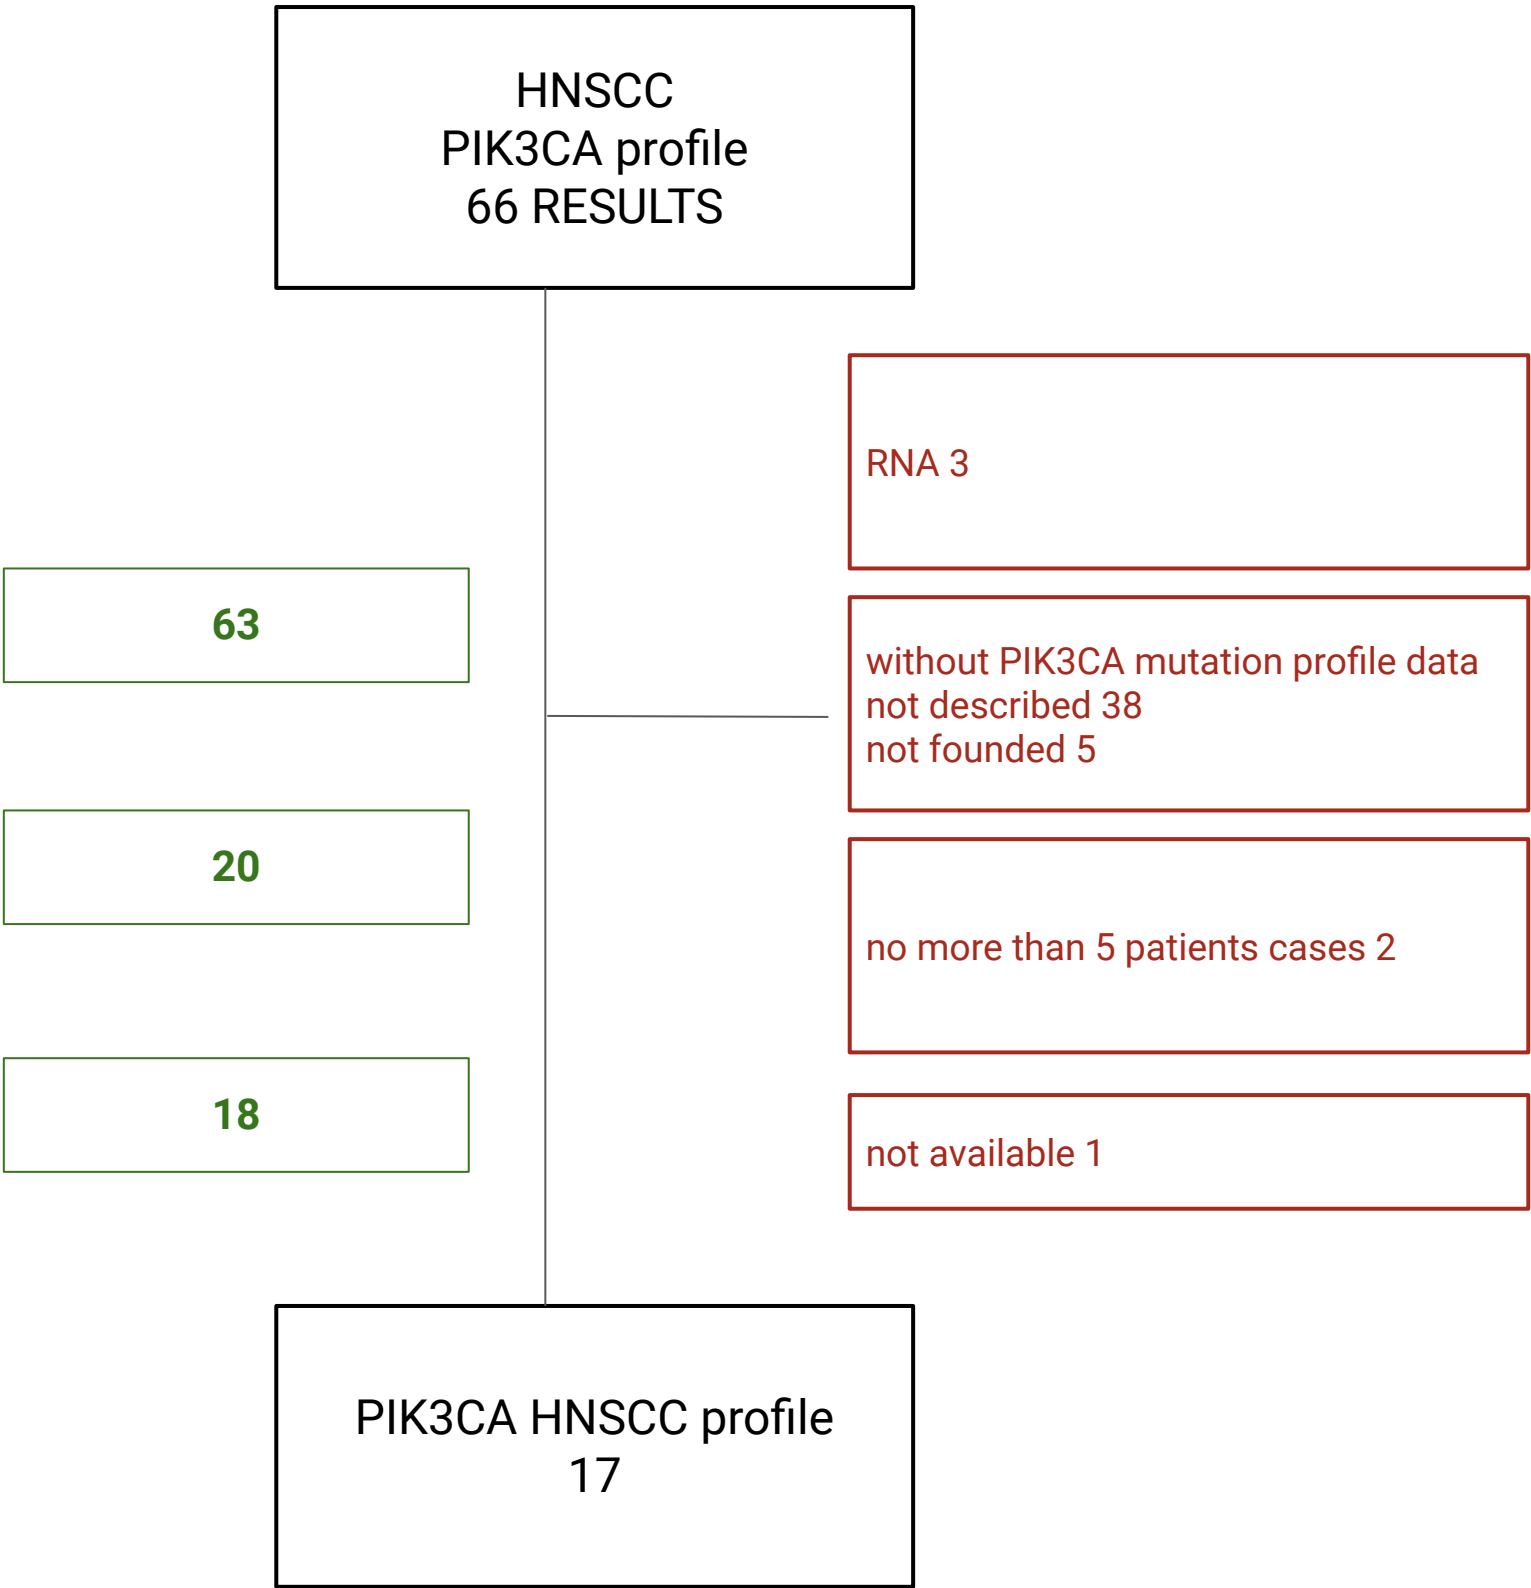

Supplement: s1 [file s1]
