# Supplementary material for: PIK3CA Gene Mutations in HNSCC: Systematic Review and Correlations with HPV Status and Patient Survival
Source: MDPI journal article supplement (doi:10.3390/cancers14051286), 2022-03-02
Supplement: s1 [file s1]

|                                    |              | [1]            | [2]          | [3]       | [4]          | [5]           | [6]            | Present Study  |    |
|------------------------------------|--------------|----------------|--------------|-----------|--------------|---------------|----------------|----------------|----|
|                                    |              | EM. Borkowska  | García-      | SB Pattle | JA. Theurer  | SM. McBride   | T Suda         |                |    |
|                                    |              | 2021           | 2018         | 2017      | 2015         | 2014          | 2012           | 2021           |    |
|                                    |              | Poland         | Spain        | Scotland  | Indian       | USA           | Japan          | Portugal       |    |
|                                    |              | 113            | 62           | 100       | 25           | 64            | 115            | 95             |    |
| Samples specimens                  |              | FFPE           | biopsy Tumor | FFPE      | biopsy Tumor | biopsy Tumor  | biopsy Tumor   | biopsy Tumor   |    |
| time collected                     |              | surgery        | surgery      | non       | untreated    | treated       | surgical       | diagnostic     |    |
| demographics                       |              |                |              |           |              |               |                |                |    |
| gender                             | Male         | 86 (76%)       | 34 (55%)     | 63 (63%)  | 19 (76%)     | 21 (91%)      | 93 (81%)       | 70 (74%)       |    |
|                                    | Female       | 27 (24%)       | 28 (45%)     | 37 (37%)  | 6 (24%)      | 2 (9%)        | 22 (19%)       | 25 (26%)       |    |
| range_age                          |              | 42–91          | 33-90        | non       | <60y n=7     | non           | non            |                |    |
| mean_age                           |              | 63             | 68           | 66        | ≥60y n=18    | non           | 65             | 62             |    |
| risk factors                       |              |                |              |           |              |               |                |                |    |
| consumptio                         | tobacco      | 84 (74%)       | 38 (61%)     | 47 (47%)  | 24 (96%)     | 13/23 (56.5%) | 115 (100%)     | 66 (70%)       |    |
|                                    | alcohol      | 62 (55%)       | non          | 76 (76%)  | non          | non           | non            |                |    |
| clinical parameters                |              |                |              |           |              |               |                |                |    |
| histologic diagnostic              |              | HNSCC          | HNSCC        | HNSCC     | HNSCC        | HNSCC         | HNSCC          | HNSCC          |    |
| tumour location subsite            | oral cavity  | 35 (31%)       | non          | 0         | 11 (44%)     | 20 (31%)      | 31 (27%)       | 20 (21%)       |    |
|                                    | oropharynx   | 30 (26%)       | non          | 52 (52%)  | 8 (32%)      | 23 (36%)      | 25 (22%)       | 75 (79%)       |    |
|                                    | larynx       | 48 (43%)       | non          | 0         | 2 (8%)       | 8 (12%)       | 23 (20%)       | 0              |    |
|                                    | Hypophary    | 0              | non          | 48 (48%)  | 2 (8%)       | 5 (8%)        | 25 (22%)       | 0              |    |
|                                    | Nasopharyn   | 0              | non          | 0         | 2 (8%)       | 3 (5%)        | 11 (10%)       | 0              |    |
|                                    | stage I      |                | non          |           | 3 (12%)      | non           | 12 (10%)       | 8 (8%)         |    |
| tumour stage                       | stage II     | 55 (49%)       | non          | 57 (57%)  | 2 (8%)       | non           | 23 (20%)       | 19 (20%)       |    |
|                                    | stage III    |                | non          |           | 2 (8%)       | non           | 26 (23%)       | 26 (27%)       |    |
|                                    | stage IV     | 58 (51%)       | non          | 43 (43%)  | 18 (72%)     | non           | 54 (47%)       | 40 (42%)       |    |
| HPV status                         | detected     | 26 (23%)       | 0            | 28 (28%)  | non          | non           | non            | 27(28%)        |    |
|                                    | not detected | 87 (77%)       | 62 (100%)    | 70 (70%)  | non          | non           | non            | 68 (72%)       |    |
| p16(+)                             | detected     | 11 (10%)       | non          | 26 (26%)  | 8 (32%)      | non           | non            | 36 (38%)       |    |
| Evaluation PIK3CA gene             |              |                |              |           |              |               |                |                |    |
| PIK3CA-assay                       |              | qPCR           | qPCR         | qPCR      | qPCR         | qPCR          | qPCR           | RT-qPCR        |    |
| overall Frequency PIK3CA mutation  |              | 9 (8%)         | 11 (18%)     | 17 (17%)  | 4 (16 %)     | 10 (16%)      | 37 (32%)       | 37* (39%)      |    |
| copynumber/expression              |              | non            | non          | yes       | non          | no            | yes            | no             |    |
| frequency PIK3CA per mutation type | exon 9       | E542K          | non          | evaluated | non          | 1             | 2              | evaluated      | 1  |
|                                    |              | E545K          | non          | evaluated | non          | 1             | 6              | evaluated      | 2  |
|                                    |              | E545D          | non          | evaluated | non          | 1             | 1              | evaluated      | 27 |
|                                    | exon 20      | H1047R         | 9            | evaluated | non          | 1             | 1              | evaluated      | 1  |
|                                    |              | H1047L         | non          | non       | non          | non           | 0              | evaluated      | 0  |
|                                    |              | oral cavity    | 3            | non       | non          | 2             | 1              | 9              | 8  |
| frequency PIK3CA per HN subsite    | oropharynx   | 0              | non          | 14        | 2            | 6             | 10             | 29             |    |
|                                    | larynx       | 6              | non          | non       | 0            | 1             | 8              | 0              |    |
|                                    | Hypophary    | non            | non          | 3         | 0            | 0             | 9              | 0              |    |
|                                    | Nasopharyn   | non            | non          | non       | 0            | 2             | 1              | 0              |    |
| PIK3CA and HPV                     | mut          | 1              | 0            | non       | non          | 5             | non            | 25             |    |
|                                    | mut          | 8              | 11           | non       | non          | 1             | non            | 12             |    |
| outcome                            |              |                |              |           |              |               |                |                |    |
| OS                                 |              | non            | non          | non       | non          | non           | no association | no association |    |
| DFS                                |              | non            | non          | non       | non          | non           | non            | better         |    |
| RFS                                |              | no correlation | non          | non       | non          | non           | non            | non            |    |

Legend:

\* 6 cases with 2 substitutions

non not described
