# Supplementary material for: PIK3CA Gene Mutations in HNSCC: Systematic Review and Correlations with HPV Status and Patient Survival
Source: MDPI journal article supplement (doi:10.3390/cancers14051286), 2022-03-02
Supplement: s1 [file s1]

|                                       |                          | [1]                                | [2]                                    | [3]                                        | [4]                                    | [5]                             | [6]                                   | [7]                        | [8]                                          | [9]                                  | [10]                              | [11]                                  | [12]                           | [13]                            | [14]                                | [15]                         | [16]                       | [17]                       |
|---------------------------------------|--------------------------|------------------------------------|----------------------------------------|--------------------------------------------|----------------------------------------|---------------------------------|---------------------------------------|----------------------------|----------------------------------------------|--------------------------------------|-----------------------------------|---------------------------------------|--------------------------------|---------------------------------|-------------------------------------|------------------------------|----------------------------|----------------------------|
|                                       |                          | Weiping Jie<br>2021<br>China<br>26 | Abeer A.<br>2020<br>Saudi Arabia<br>44 | V. Denninghoffa<br>2020<br>Argentina<br>49 | Kulsoom Ghias<br>2019<br>Pakistan<br>7 | Sunny Haft<br>2019<br>USA<br>46 | Sun Min Lim<br>2019<br>Korea<br>92/93 | D.<br>2016<br>USA<br>75/93 | Ali M. Al-Amri<br>2016<br>Saudi Arabia<br>48 | Nicole G. Chau<br>2016<br>USA<br>213 | Sejal Shah<br>2015<br>India<br>50 | Shu-Jen Chen<br>2015<br>Taiwan<br>345 | Barbara<br>2015<br>Italy<br>76 | Nichols AC<br>2013<br>USA<br>87 | Yoram Cohen<br>2011<br>Israel<br>37 | Karl C.<br>2010<br>USA<br>35 | Qiu W<br>2008<br>USA<br>24 | Qiu W<br>2006<br>USA<br>30 |
| Samples specimens                     |                          | tumour tissue                      | tumour tissue                          | tumour tissue                              | tumour tissue                          | tumour tissue                   | tumour tissue                         | tumour tissue              | tumour tissue                                | tumour tissue                        | tumour tissue                     | tumour tissue                         | tumour tissue                  | tumour tissue                   | tumour tissue                       | tumour tissue                | tumour tissue              | tumour tissue              |
| time collected                        |                          | surgery                            | diagnostic                             | non                                        | treatment-naïve                        | non                             | treatment-naïve                       | surgery                    | treatment-naïve                              | non                                  | surgery                           | treatment-naïve                       | surgery                        | treatment-naïve                 | non                                 | diagnostic                   | surgery                    | non                        |
| demographics                          |                          |                                    |                                        |                                            |                                        |                                 |                                       |                            |                                              |                                      |                                   |                                       |                                |                                 |                                     |                              |                            |                            |
| gender                                | Male                     | 20                                 | 23 (52%)                               | 36 (49%)                                   | 5                                      | 41 (89%)                        | 75 (81%)                              | 90                         | 32                                           | 158                                  | 36 (72%)                          | 325 (94%)                             | non                            | 71                              | 16                                  | 19                           | 19                         | non                        |
|                                       | Female                   | 6                                  | 21 (48%)                               | 38 (51%)                                   | 2                                      | 5 (11%)                         | 18 (19%)                              | 3                          | 16                                           | 55                                   | 14 (28%)                          | 20 (6%)                               | non                            | 16                              | 21                                  | 16                           | 5                          | non                        |
| range_age                             |                          | 35-79                              | 21-93                                  | 41-93                                      | 35-71                                  | 35-74                           | 28-80                                 | 36-86                      | 18-90                                        | 22-88                                | 27-70                             | 27-89                                 | non                            | <60y (n=51)                     | 24-90                               | 28-91                        | 38-78                      | 40-85                      |
| mean_age                              |                          | 61                                 | 56                                     | 68                                         | 54                                     | 56                              | 59                                    | 60                         | 54                                           | 59                                   | 47                                | 50                                    | non                            | ≥60y (n=36)                     | 70                                  | 69                           | 58                         | 64                         |
| clinical parameters                   |                          |                                    |                                        |                                            |                                        |                                 |                                       |                            |                                              |                                      |                                   |                                       |                                |                                 |                                     |                              |                            |                            |
| histologic diagnostic                 |                          | SCC                                | SCC                                    | SCC                                        | SCC                                    | SCC                             | SCC                                   | SCC                        | SCC                                          | SCC                                  | SCC                               | SCC                                   | SCC                            | SCC                             | SCC                                 | SCC                          | SCC                        | SCC                        |
| tumour location<br>subsite            | oral cavity              | 11 (42.3%)                         | 44                                     | 47                                         | 6                                      | 0                               | 35 (38%)                              | 0                          | non                                          | 60                                   | 50                                | 345                                   | 0                              | 0                               | 37                                  | 45                           | 0                          | 8                          |
|                                       | oropharynx               | 6 (23.1%)                          | 0                                      | 2                                          | 0                                      | 46                              | 26 (28%)                              | 0                          | non                                          | 97                                   | 0                                 | 0                                     | 76                             | 87                              | 0                                   | 0                            | 0                          | 0                          |
|                                       | larynx                   | 0                                  | 0                                      | 0                                          | 0                                      | 0                               | 12 (13%)                              | 41                         | 14 (29%)                                     | 24                                   | 0                                 | 0                                     | 0                              | 0                               | 0                                   | 0                            | 0                          | 10                         |
|                                       | Hypopharynx              | 0                                  | 0                                      | 0                                          | 0                                      | 0                               | 15 (16%)                              | 34                         | 9 (19%)                                      | 6                                    | 0                                 | 0                                     | 0                              | 0                               | 0                                   | 0                            | 24                         | 6                          |
|                                       | Nasopharynx              | 0                                  | 0                                      | 0                                          | 1                                      | 0                               | 5 (5%)                                | 0                          | 20 (42%)                                     | 12                                   | 0                                 | 0                                     | 0                              | 0                               | 0                                   | 0                            | 0                          | 2                          |
|                                       | not stratified           | 0                                  | 0                                      | 0                                          | 0                                      | 0                               | 0                                     | 0                          | 5 (10%)                                      | 14                                   | 0                                 | 0                                     | 0                              | 0                               | 0                                   | 0                            | 0                          | 4                          |
|                                       | HPV status               | detected                           | 2 (8%)                                 | 10 (23%)                                   | non                                    | 0                               | 46                                    | 20 (22%)                   | 0                                            | non                                  | 103 (48%)                         | non                                   | non                            | 17 (22%)                        | 46 (53%)                            | non                          | non                        | non                        |
|                                       | not detected             | 24 (92%)                           | 34 (77%)                               | non                                        | 7                                      | 0                               | 56 (60%)                              | 75                         | non                                          | 34 (16%)                             | non                               | non                                   | 59 (78%)                       | 41 (47%)                        | non                                 | non                          | non                        | non                        |
| Evaluation PIK3CA gene                |                          |                                    |                                        |                                            |                                        |                                 |                                       |                            |                                              |                                      |                                   |                                       |                                |                                 |                                     |                              |                            |                            |
| PIK3CA-assay                          |                          | SANGER                             | NGS                                    | SANGER                                     | WES                                    | WES                             | NGS                                   | NGS                        | SANGER                                       | NGS                                  | SANGER                            | NGS                                   | SANGER                         | SANGER                          | SANGER                              | SANGER                       | SANGER                     | SANGER                     |
| assay target analysis                 |                          | DNA                                | DNA                                    | DNA                                        | DNA                                    | DNA                             | DNA                                   | DNA                        | DNA                                          | DNA                                  | DNA                               | DNA                                   | DNA                            | DNA                             | DNA                                 | DNA                          | DNA                        | DNA                        |
| Overall Frequency PIK3CA mutation     |                          | 8 (31%)                            | 16 (36%)                               | 16 (32%)                                   | 1 (14%)                                | 13 (28%)                        | 19/92 (21%)                           | 10/75 (13%)                | 14 (29%)                                     | 28 (13%)                             | 18 (36%)                          | 58 (17%)                              | 2 (3%)                         | 17 (20%)                        | 4 (11%)                             | 1 (3%)                       | 5 (21%)                    | 4 (11%)                    |
| frequency                             | exon 9 (*)               | detected                           | 13                                     | 8                                          | 1                                      | 9                               | 5                                     | 1                          | 7                                            | detected                             | 2                                 | 7                                     | 2                              | 13                              | 2                                   | 1                            | 3                          | 2                          |
| PIK3CA per exon                       | exon 20 (#)              | 1                                  | 3                                      | 8                                          | 0                                      | 1                               | non                                   | 9                          | 2                                            | detected                             | 15                                | 45                                    | non                            | 4                               | 2                                   | 0                            | 2                          | 2                          |
| hotspot mutation                      | not stratified/novel (+) | 18                                 | non                                    | non                                        | non                                    | 3                               | 14                                    | non                        | 5                                            | non                                  | 1                                 | 6                                     | non                            | non                             | non                                 | 0                            | 0                          | 8                          |
| frequency<br>PIK3CA per HN<br>subsite | oral cavity              | non                                | 16                                     | 16                                         | 1                                      | non                             | non                                   | 0                          | non                                          | non                                  | 18                                | 58                                    | non                            | non                             | 4                                   | 1                            | non                        | 1                          |
|                                       | oropharynx               | non                                | non                                    | non                                        | non                                    | non                             | non                                   | 0                          | non                                          | non                                  | non                               | non                                   | 2                              | 17                              | non                                 | non                          | non                        | 0                          |
|                                       | larynx                   | non                                | non                                    | non                                        | non                                    | non                             | non                                   | 8                          | non                                          | non                                  | non                               | non                                   | non                            | non                             | non                                 | non                          | non                        | 0                          |
|                                       | Hypopharynx              | non                                | non                                    | non                                        | non                                    | non                             | non                                   | 2                          | 8                                            | non                                  | non                               | non                                   | non                            | non                             | non                                 | non                          | 5                          | 3                          |
|                                       | Nasopharynx              | non                                | non                                    | non                                        | non                                    | non                             | non                                   | 0                          | non                                          | non                                  | non                               | non                                   | non                            | non                             | non                                 | non                          | non                        | 0                          |
| PIK3CA and<br>HPV                     | mut PIK3CA HPV(+)        | non                                | non                                    | non                                        | 0                                      | 13                              | 4                                     | 0                          | non                                          | non                                  | non                               | non                                   | 1                              | 13                              | non                                 | non                          | non                        | non                        |
|                                       | mut PIK3CA HPV(-)        | non                                | non                                    | non                                        | 1                                      | non                             | 3                                     | 10                         | non                                          | non                                  | non                               | non                                   | 1                              | 4                               | non                                 | non                          | non                        | non                        |
| HNSCC PIK3CA<br>mutation<br>outcome   | OS                       | non                                | better (p=0.09)                        | non                                        | non                                    | non                             | better (p=0.0755)                     | non                        | non                                          | not associated                       | non                               | non                                   | non                            | non                             | better (p=0.761)                    | non                          | non                        | non                        |
|                                       | DFS                      | non                                | non                                    | non                                        | non                                    | non                             | non                                   | better (p=0.063)           | non                                          | non                                  | non                               | non                                   | non                            | non                             | non                                 | non                          | non                        | non                        |
|                                       | RFS                      | non                                | non                                    | non                                        | non                                    | non                             | non                                   | non                        | non                                          | non                                  | non                               | non                                   | non                            | non                             | non                                 | non                          | non                        | non                        |
| PIK3CA mutation profile               |                          |                                    |                                        |                                            |                                        |                                 |                                       |                            |                                              |                                      |                                   |                                       |                                |                                 |                                     |                              |                            |                            |
|                                       |                          | *A533T                             | * E545K                                | * E542 K (n=1)                             | * E545 K (n=1)                         | * E542 K (n=1)                  | * E545 K (n=5)                        | * E542 K (n=1)             | * E542K (n=7)                                | * E542K                              | * E542K (n=1)                     | * D549                                | * E542K                        | * E542K (n=8)                   | * E542K                             | * E545K (n=1)                | * E542K (n=1)              | * E542K (n=1)              |
|                                       |                          | * C535P                            | # p.A1066T                             | * E545 K (n=6)                             |                                        | * E545 K (n=8)                  |                                       |                            | * E545 K                                     | # T1025T (n=2)                       | * E545K                           | * E545K (n=1)                         | * E542                         | * E545K                         | * E545K (n=5)                       | * E545K (n=2)                | * E545K (n=1)              | * E545K (n=1)              |
|                                       |                          | * E522V                            |                                        | * F550L (n=1)                              |                                        | # G1049R (n=1)                  |                                       | # H1047R (n=9)             | + * S541S (n=1)                              | # H1047R                             | # A994A (n=1)                     | * E545                                |                                | # H1047R (n=4)                  | # G1049R (n=1)                      |                              | * E542G (n=1)              | # H1047R (n=1)             |
|                                       |                          | * T5441I                           |                                        | * E545 G                                   |                                        |                                 |                                       |                            | + * R516K (n=1)                              |                                      | # T1025T (n=14)                   | # A1046                               |                                |                                 | # H1047R (n=1)                      |                              | # M1040V (n=1)             | + Y343C (n=1)              |
|                                       |                          | # A990V                            |                                        | * E545Q                                    |                                        |                                 |                                       |                            | + # T1053A (n=1)                             |                                      | + C2985T (n=1)                    | # G1049                               |                                |                                 | # H1047L                            |                              | # H1047R (n=1)             |                            |
|                                       |                          | # D1056G                           |                                        | * Q546L                                    |                                        |                                 |                                       |                            | + # Y1021Y (n=1)                             |                                      |                                   | # H1047R                              |                                |                                 | # H1047Y                            |                              |                            |                            |
|                                       |                          | # P998S                            |                                        | # M1043I (n=8)                             |                                        |                                 |                                       |                            | + # N1068S (n=1)                             |                                      |                                   | # H1048                               |                                |                                 |                                     |                              |                            |                            |
|                                       |                          | # F1016L                           |                                        | # M1043V                                   |                                        |                                 |                                       |                            |                                              |                                      |                                   | # M1043                               |                                |                                 |                                     |                              |                            |                            |
|                                       |                          | # H994Y                            |                                        | # H1047L                                   |                                        |                                 |                                       |                            |                                              |                                      |                                   |                                       |                                |                                 |                                     |                              |                            |                            |
|                                       |                          | # H1047R                           |                                        | # H1047R                                   |                                        |                                 |                                       |                            |                                              |                                      |                                   |                                       |                                |                                 |                                     |                              |                            |                            |
|                                       |                          | # H1065R                           |                                        |                                            |                                        |                                 |                                       |                            |                                              |                                      |                                   |                                       |                                |                                 |                                     |                              |                            |                            |
|                                       |                          | # H1062T                           |                                        |                                            |                                        |                                 |                                       |                            |                                              |                                      |                                   |                                       |                                |                                 |                                     |                              |                            |                            |
|                                       |                          | # S1008P                           |                                        |                                            |                                        |                                 |                                       |                            |                                              |                                      |                                   |                                       |                                |                                 |                                     |                              |                            |                            |
|                                       |                          | # S1015S                           |                                        |                                            |                                        |                                 |                                       |                            |                                              |                                      |                                   |                                       |                                |                                 |                                     |                              |                            |                            |
|                                       |                          | # T1061A                           |                                        |                                            |                                        |                                 |                                       |                            |                                              |                                      |                                   |                                       |                                |                                 |                                     |                              |                            |                            |
|                                       |                          | # Q981                             |                                        |                                            |                                        |                                 |                                       |                            |                                              |                                      |                                   |                                       |                                |                                 |                                     |                              |                            |                            |
|                                       |                          | # Q1033                            |                                        |                                            |                                        |                                 |                                       |                            |                                              |                                      |                                   |                                       |                                |                                 |                                     |                              |                            |                            |
|                                       |                          | # Q1064                            |                                        |                                            |                                        |                                 |                                       |                            |                                              |                                      |                                   |                                       |                                |                                 |                                     |                              |                            |                            |
|                                       |                          | # W1057                            |                                        |                                            |                                        |                                 |                                       |                            |                                              |                                      |                                   |                                       |                                |                                 |                                     |                              |                            |                            |
