# Supplementary material for: PIK3CA Gene Mutations in HNSCC: Systematic Review and Correlations with HPV Status and Patient Survival
Source: Cancers (Basel). 2022 Mar 2;14(5):1286. doi: 10.3390/cancers14051286 (PMC8909011; doi:10.3390/cancers14051286)
Supplement: Supplementary file 1 [file cancers-14-01286-s001.zip]

Archive with 8 entries (8 files):
- Figure S1-Participant flow chart.pdf
- Figure S2-Kaplan-Meier overall survival curves for the included and excluded groups.pdf
- Figure S3-Flow chart from Sistematic-review Inclusion criteria.pdf
- Supplement_Systematic review References.pdf
- Table S1-Systematic review HNSCC PIK3CA qPCR.pdf
- Table S2-Overall 17 articles selected for HNSCC PIK3CA mutation.pdf
- Table S3-HNSCC PIK3CA Mutational profile.pdf
- Table S4-Clinical and demographic characterization of the 295 excluded cases.pdf
