# Supplementary figures and images for: PIK3CA Gene Mutations in HNSCC: Systematic Review and Correlations with HPV Status and Patient Survival
Source: MDPI journal article supplement (doi:10.3390/cancers14051286), 2022-03-02

Figure S1: Participant flow chart

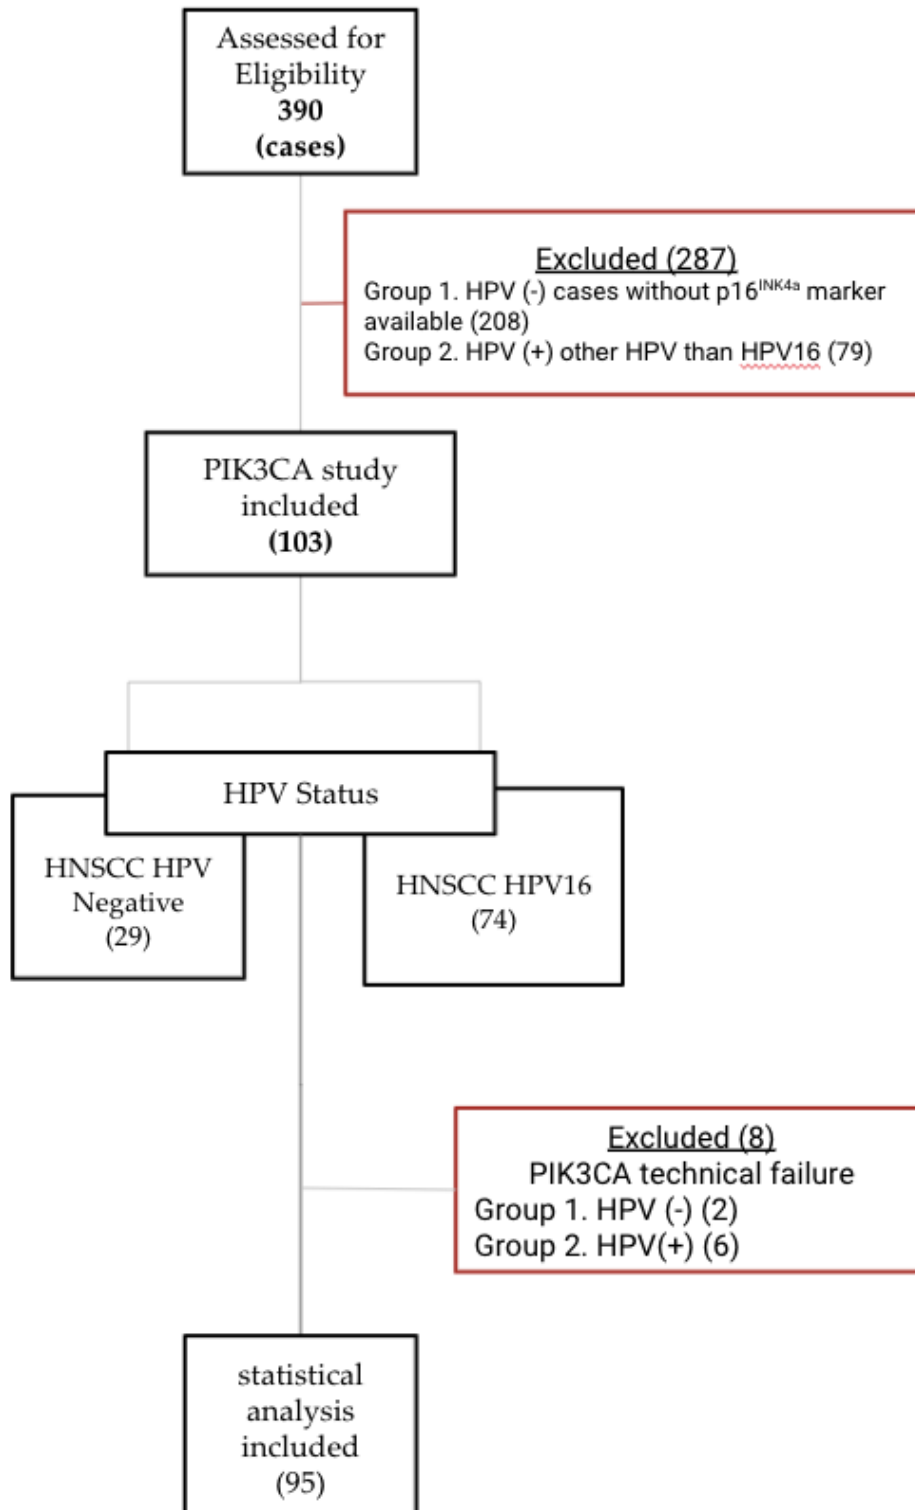

Supplement: s1 [file s1]

Figure S2:Kaplan-Meier overall survival curves for the included and excluded groups

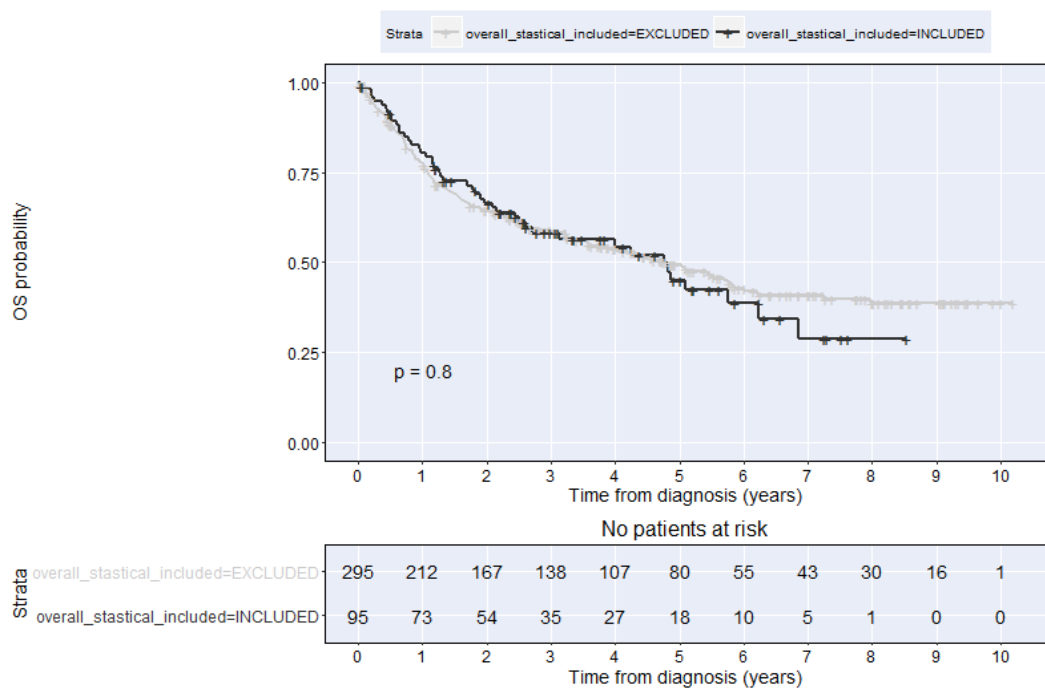

Supplement: s1 [file s1]
